# Supplementary material for: Effect of stress state on the domain configuration and switching behavior in ferroelectric thin films
Source: Royal Society of Chemistry journal article supplement (doi:10.1039/c2ra20678a), 2012-01-01
Supplement: c2ra20678a.pdf [file c2ra20678a.pdf]

## SUPPLEMENTARY INFORMATION for

### Effect of stress state on the domain configuration and switching behavior in ferroelectric thin films

Manoj Narayanan, Mengchun Pan, Shanshan Liu, Sheng Tong, Seungbum Hong, Beihai Ma, and Uthamalingam Balachandran

#### A. Stress Calculations:

Stresses in the films were calculated using the properties available in the literature for bulk PLZT materials. The stresses in PLZT films were determined using the properties given below and Eq (1).

Table of Properties used for films and substrates:

$$\alpha_{\text{PLZT}} = 5.4 \times 10^{-6} /^{\circ}\text{C}; \alpha_{\text{LNO}} = 12.5 \times 10^{-6} /^{\circ}\text{C}; \alpha_{\text{Si}} = 3 \times 10^{-6} /^{\circ}\text{C}; \alpha_{\text{Ni}} = 14.1 \times 10^{-6} /^{\circ}\text{C}; \\ E_{\text{PZT}} = 85\text{GPa}; \nu_{\text{PZT}} = 0.28; \Delta T = 625^{\circ}\text{C}$$

Stress was calculated using Eq (1). Negative and positive values indicate compressive and tensile stress, respectively, observed in the films.

$$\sigma_{\text{PLZT}} = \frac{E_{\text{PLZT}}}{(1 - \nu_{\text{PLZT}})} (\Delta\alpha \times \Delta T) \quad \dots\dots\text{Eq (1)}$$

#### B. Gibbs Free Energy Calculations:

Under the Landau-Ginzburg-Devonshire theory, Gibbs free energy is defined as

$$\Delta G = \alpha_1 (P_1^2 + P_2^2 + P_3^2) + \alpha_{11} (P_1^4 + P_2^4 + P_3^4) + \alpha_{12} (P_1^2 P_2^2 + P_2^2 P_3^2 + P_3^2 P_1^2) + \alpha_{111} (P_1^6 + P_2^6 + P_3^6) \\ + \alpha_{112} [P_1^4 (P_2^2 + P_3^2) + P_2^4 (P_3^2 + P_1^2) + P_3^4 (P_1^2 + P_2^2)] + \alpha_{123} P_1^2 P_2^2 P_3^2 - \frac{1}{2} s_{11} (X_1^2 + X_2^2 + X_3^2) \\ - s_{12} (X_1 X_2 + X_2 X_3 + X_3 X_1) - \frac{1}{2} s_{44} (X_4^2 + X_5^2 + X_6^2) - Q_{11} (X_1 P_1^2 + X_2 P_2^2 + X_3 P_3^2) \\ - Q_{12} [X_1 (P_2^2 + P_3^2) + X_2 (P_3^2 + P_1^2) + X_3 (P_1^2 + P_2^2)] - Q_{44} (X_4 P_2 P_3 + X_5 P_3 P_1 + X_6 P_1 P_2) \\ \dots\dots\text{Eq (2)}$$

For tetragonal compositions,  $P_1 = P_2 = 0$ ,  $P_3 \neq 0$ ; For two dimensional stress,  $X_1 = X_2 \neq 0$ ;  $X_3 = X_4 = X_5 = X_6 = 0$ . Therefore  $\Delta G$  reduces to:

$$\Delta G = \alpha_1 P_3^2 + \alpha_{11} P_3^4 + \alpha_{111} P_3^6 - \frac{1}{2} s_{11} (X_1^2 + X_2^2) - s_{12} (X_1 X_2) - Q_{12} (X_1 P_3^2) + X_2 P_3^2$$

.....Eq (3)

$$\left. \frac{\partial G}{\partial P} \right|_X = 0 = \sqrt{\frac{-\alpha_{11} + \sqrt{\alpha_{11}^2 - 3\alpha_1 \alpha_{111} + 6Q_{12} \alpha_{111} X}}{3\alpha_{111}}}$$

.....Eq (4)

| <b>PZT 50/50 Constants [S1]</b> |                         |
|---------------------------------|-------------------------|
| $\alpha_l$ @ 25C, m/F           | $-2.669 \times 10^7$    |
| $\alpha_{11}$ , $m^5/C^2F$      | $-1.431 \times 10^7$    |
| $\alpha_{111}$ , $m^9/C^4F$     | $1.342 \times 10^8$     |
| $Q_{11}$ , $m^4/C^2$            | $6.50 \times 10^{-2}$   |
| $Q_{12}$ , $m^4/C^2$            | $-3.20 \times 10^{-2}$  |
| $s_{11}$ , $m^2/N$              | $6.785 \times 10^{-12}$ |
| $s_{12}$ , $m^2/N$              | $-2.50 \times 10^{-12}$ |

### **C. Second Order Phase Transition**

For second order phase transition, the remnant polarization decreases to zero as temperature approaches the Curie Temperature and is defined by Eq (5) [S2]

$$P_r = [\kappa_p (T_c - T) / \beta'_p]^{1/2}$$

.....Eq (5)

Measured data was fitted with this equation to achieve correlation coefficient of >0.99 and the respective curie temperatures are reported in the communication.

### **References**

[S1] A. Amin, R. E. Newnham and L. E. Cross, Phys. Rev. B. 34 (3), 1595, 1986

[S2] H. Zhu, D. P. Chu, J. Phys. Condens. Matter. 23, 495901, 2011
